# Supplementary material for: Altered Effective Connectivity within an Oculomotor Control Network in Unaffected Relatives of Individuals with Schizophrenia
Source: MDPI journal article supplement (doi:10.3390/brainsci11091228), 2021-09-17
Supplement: s1 [file s1]

## Supplementary Materials

### Article

# Altered Effective Connectivity within an Oculomotor Control Network in Unaffected Relatives of Individuals with Schizophrenia

Matthew Lehet <sup>1</sup>, Ivy F. Tso <sup>2</sup>, Sohee Park <sup>3</sup>, Sebastiaan F. W. Neggers <sup>4</sup>, Ilse A. Thompson <sup>4</sup>, Rene S. Kahn <sup>5</sup> and Katharine N. Thakkar <sup>1,6,\*</sup>

<sup>1</sup> Department of Psychology, Michigan State University, East Lansing, MI 48824; USA; lehetmat@msu.edu

<sup>2</sup> Department of Psychiatry, University of Michigan, Ann Arbor, MI 48109, USA; ivytso@med.umich.edu

<sup>3</sup> Department of Psychology, Vanderbilt University, Nashville, TN 37235, USA; sohee.park@vanderbilt.edu

<sup>4</sup> Department of Psychiatry, University Medical Center Utrecht; Utrecht, 3584 CX; Netherlands; B.Neggers@umcutrecht.nl (S.F.W.N.); ilsethompson@hotmail.com (I.A.T.)

<sup>5</sup> Department of Psychiatry, Icahn School of Medicine at Mount Sinai, New York, NY 10029, USA; ene.kahn@mssm.edu

<sup>6</sup> Department of Psychiatry and Biobehavioral Medicine, Michigan State University, East Lansing, MI 48824, USA

\* Correspondence: kthakkar@msu.edu

## Exploratory Whole Brain Analysis

### Methods

We conducted an exploratory whole brain analysis, examining the contrasts described in the manuscript (redirect versus fixation, no-step versus fixation, and redirect versus no-step) using uncorrected voxel thresholds  $p < 0.001$ . Statistical maps were masked to include voxels within grey matter and significant clusters were defined based on  $p < 0.05$  FWE-corrected for multiple cluster-level comparisons.

### Results

Significant within-group activation clusters for the examined contrasts are presented in **Table S1** and **Figure S1**. At a whole-brain level, in the redirect > no-step contrast, HC showed activation in a large network of frontal, parietal, and occipital regions. Of particular interest were regions involved in saccade planning and execution such as bilateral FEF, bilateral SEF extending into right ACC, and right IFC for redirect versus no-step trials. In SIB, similar regions as HC showed a difference but they showed qualitatively less activation with the exception of bilateral insula, left IFC and left inferior parietal. No differences between groups in the redirect versus no-step contrast reached significance.

Examination of within group effects in the redirect versus fixation and no-step versus fixation contrasts separately revealed similar patterns of activity in both groups but with qualitatively greater extent in the SIB group. The relatively reduced redirect versus no-step activation in SIB was driven by relatively more no-step activation that was more similar to redirect among SIB. Interestingly, in both no-step greater than fixation and redirect greater than fixation contrasts, group differences were seen in bilateral anterior cingulate with more activation in SIB.

## Comparison of Sample Characteristics Between Experiment 1 and Experiment 2

### Methods

In Experiment 1, we found significant differences in SSRT between HC and relatives, but in Experiment 2 the difference in TSRT between groups was marginal. In order to test whether differences between the two samples of unaffected relatives might explain these small differences across studies, we compared IQ, age, and social functioning as measured

by the Social Functioning Scale (SFS; Birchwood, Smith, Cochrane, Wetton, & Copestake, 1990) employment subscale score and total score using two-sample t-tests.

### *Results*

Comparisons of relative groups showed no significant differences in age ( $t(32)=-1.93$ ,  $p = 0.063$ ), IQ ( $t(32) = -0.45$ ,  $p = 0.656$ ), SFS employment subscale ( $t(31)=1.23$ ,  $p=0.229$ ), or SFS total ( $t(31)=1.61$ ,  $p = 0.118$ ). The relatives in Experiment 1 were older (mean = 36.5 years, standard deviation = 11.01) than the siblings in Experiment 2 (mean = 31.09 years, standard deviation = 5.46), but this difference did not reach significance.

## **Calculation of Bayes Factors for SSRT and TSRT in Experiment 1 and Experiment 2 Respectively**

### *Methods*

Given our sample sizes it is worth examining the likelihood of the null and alternative hypotheses given our sample and effect sizes. Therefore, we calculated Bayes factors for the t-test comparing SSRT between HC and REL groups in Experiment 1 and the t-test comparing TSRT between HC and SIB groups in Experiment 2. We used the online calculator provided online (<http://pcl.missouri.edu/bf-two-sample>) that implements the procedure from Rouder et al. (2009). We used an  $r$  scale value of 1 as suggested in the manuscript and report the JZS Bayes Factor value.

### *Results*

For the comparison of SSRT between HC and REL in Experiment 1 the scaled JZS Bayes Factor is 2.548. For the comparison of TSRT between HC and SIB in Experiment 2 the scaled JZS Bayes Factor is 1.115. These results suggest weak or anecdotal evidence supporting longer SSRT/TSRT in unaffected relatives (Jeffreys, 1961; Raftery, 1995; Wetzel et al., 2011).

## **Group Differences in the relationship between DCM parameters and TSRT**

### *Methods*

For each of the parameters that was associated with TSRT using the backwards elimination procedure for either group we ran follow up regression analyses that predicted TSRT for all participants in the neuroimaging analysis based on parameter values, group, and parameter by group interactions. This was done to examine whether group moderates the relationship between parameter values and TSRT. All models took the form  $TSRT \sim group + param\_values + group*param\_values$ . Group was coded as 1 for siblings and -1 for healthy controls.

### *Results*

Two of the parameters identified as showing significant relationships within either group showed significant results when investigated across groups. For the connection from FEF to caudate, group significantly predicted TSRT ( $p=0.002$ ) with siblings showing longer TSRTs. The main effect of parameter values and the interaction between group and parameter values were not significant. For the connection from the rIFC to the SEF, more excitatory parameter values across both groups were associated with reduced TSRT ( $p=0.032$ ); however, there were no effects of group or interaction with group. None of the other parameters showed significant relationships when considered across groups (see Table S5).

# Supplementary Figure Legends

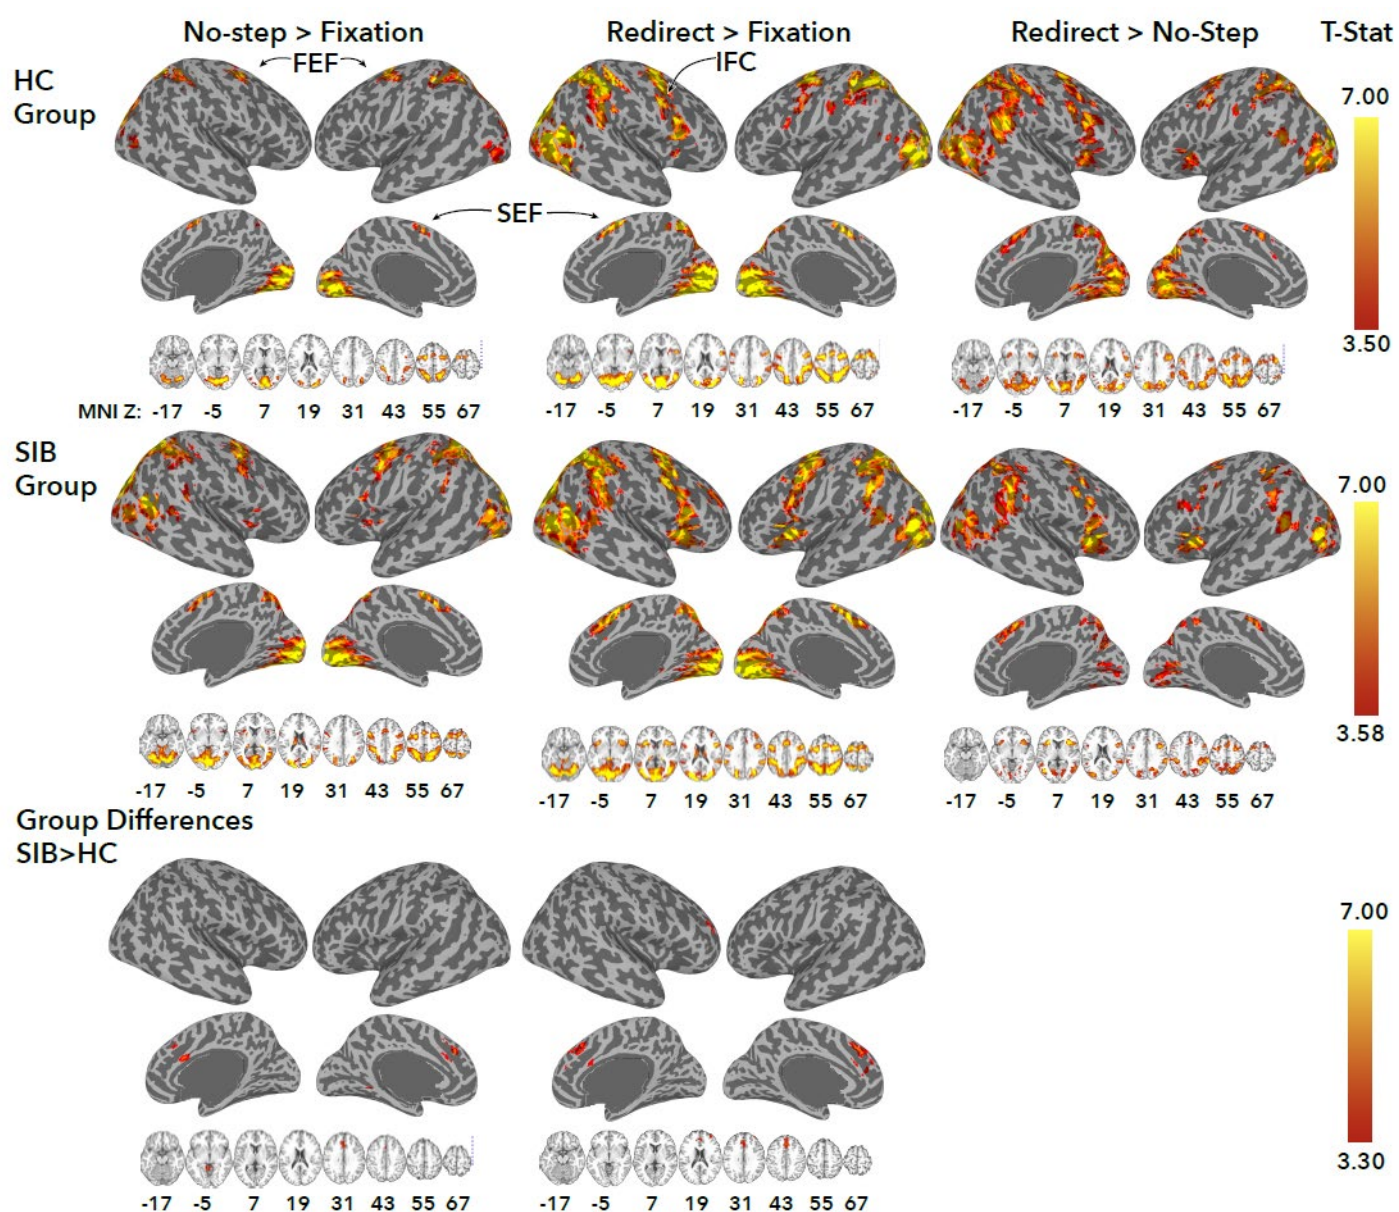

**Figure S1.** GLM results for healthy controls (top row), siblings (middle row), and their comparison (bottom row) for 3 contrasts: no-step greater than fixation (left column), redirect greater than fixation (middle column), and redirect greater than no-step (right column). No areas showed significant effects for the between group comparisons in the redirect greater than no-step condition. Minimum T-statistics were set to an uncorrected  $p = 0.001$ . Only clusters that had a FWE corrected  $p$ -value  $p < .05$  using cluster-wise multiple corrections are visualized. For the group comparisons warm colors reflect the contrast of siblings greater than healthy controls. No regions were identified where healthy controls showed more activation than siblings. Slices show the same effects visualized at the labeled MNI Z axis slice number. Slices are visualized on a skull stripped MNI colin27 template using MRIcron, and surface images are displayed on an MNI surface in Afni's SUMA visualization tool.

# Supplementary Tables

**Table S1.** GLM results.

|                              | Cluster Size | Cluster wise | Peak   | Peak MNI Coordinates (mm) |     |     |                                |
|------------------------------|--------------|--------------|--------|---------------------------|-----|-----|--------------------------------|
| Analysis                     | (Voxels)     | P (FWE-corr) | T-stat | x                         | y   | z   | Region                         |
| Controls: No-Step > Fixation |              |              |        |                           |     |     |                                |
|                              | 3362         | 0            | 12.92  | -6                        | -78 | -3  | Left Lingual                   |
|                              |              |              | 12.24  | 12                        | -93 | 6   | Right Calcarine                |
|                              |              |              | 11.18  | -21                       | -63 | 57  | Left Superior Parietal         |
|                              |              |              | 9.87   | 18                        | -75 | -9  | Right Lingual                  |
|                              |              |              | 9.15   | 21                        | -63 | 60  | Right Superior Parietal        |
|                              |              |              | 9.01   | -18                       | -78 | -9  | Left Lingual                   |
|                              |              |              | 8.17   | -9                        | -96 | 12  | Left Superior Occipital        |
|                              |              |              | 7.88   | -30                       | -57 | 51  | Left Inferior Parietal         |
|                              |              |              | 7.87   | -15                       | -90 | 0   | Left Lingual                   |
|                              |              |              | 7.83   | -36                       | -48 | 51  | Left Inferior Parietal         |
|                              | 228          | 0            | 9.02   | 24                        | -3  | 48  | Right Precentral               |
|                              |              |              | 6.51   | 39                        | -3  | 48  | Right Precentral               |
|                              | 273          | 0            | 9      | -24                       | -3  | 54  | Left Superior Frontal          |
|                              |              |              | 7.05   | -45                       | -3  | 54  | Left Precentral                |
|                              | 119          | 0.001        | 5.85   | -3                        | 3   | 57  | Left Supplementary Motor Area  |
|                              |              |              | 5.78   | 6                         | 6   | 60  | Right Supplementary Motor Area |
|                              |              |              | 5.67   | -6                        | -3  | 66  | Left Supplementary Motor Area  |
| Siblings: No-Step > Fixation |              |              |        |                           |     |     |                                |
|                              | 7076         | 0            | 14.82  | -9                        | -96 | 12  | Left Superior Occipital        |
|                              |              |              | 14.56  | 6                         | -81 | -6  | Right Lingual                  |
|                              |              |              | 12.88  | 12                        | -90 | 0   | Right Calcarine                |
|                              |              |              | 11.54  | -3                        | -69 | -3  | Left Lingual                   |
|                              |              |              | 10.73  | 12                        | -96 | 12  | Right Cuneus                   |
|                              |              |              | 10.57  | 24                        | -63 | 42  | Right Superior Occipital       |
|                              |              |              | 10.42  | -30                       | -57 | -30 | Left Cerebellum                |
|                              |              |              | 10.38  | 21                        | -69 | 51  | Right Superior Parietal        |
|                              |              |              | 10.36  | -15                       | -63 | 60  | Left Precuneus                 |
|                              |              |              | 9.86   | -21                       | -78 | -12 | Left Lingual                   |
|                              | 67           | 0.003        | 10.56  | 24                        | -30 | 6   | Right Thalamus                 |
|                              |              |              | 5.04   | 12                        | -18 | 15  | Right Thalamus                 |
|                              | 1360         | 0            | 8.6    | 30                        | 0   | 54  | Right Middle Frontal           |
|                              |              |              | 8.45   | -27                       | -6  | 60  | Left Superior Frontal          |
|                              |              |              | 8.1    | -51                       | 6   | 42  | Left Precentral                |
|                              |              |              | 8.09   | 42                        | 0   | 51  | Right Precentral               |
|                              |              |              | 7.57   | -6                        | -3  | 63  | Left Supplementary Motor Area  |
|                              |              |              | 7.25   | -45                       | -3  | 48  | Left Precentral                |
|                              |              |              | 7.21   | 0                         | 9   | 54  | Left Supplementary Motor Area  |
|                              |              |              | 7.03   | -30                       | 0   | 66  | Left Superior Frontal          |
|                              |              |              | 6.88   | -24                       | -9  | 45  | Left Precentral                |
|                              |              |              | 6.58   | 9                         | 6   | 66  | Right Supplementary Motor Area |
|                              | 101          | 0            | 6.52   | -18                       | -27 | 15  | Left Thalamus                  |
|                              |              |              | 6.43   | -12                       | -21 | 15  | Left Thalamus                  |
|                              |              |              | 6.42   | -21                       | -33 | 6   | Left Thalamus                  |
|                              |              |              | 4.29   | -18                       | -6  | 21  | Left Caudate                   |
|                              | 98           | 0            | 5.99   | -24                       | 6   | 6   | Left Putamen                   |
|                              |              |              | 4.89   | -42                       | 3   | 3   | Left Insula                    |



|                              |       |       |     |      |    |                                    |    |                         |
|------------------------------|-------|-------|-----|------|----|------------------------------------|----|-------------------------|
| 7011                         | 0     | 10.07 | 27  | -84  | 18 | Right Middle Occipital             |    |                         |
|                              |       | 9.64  | 24  | -66  | 51 | Right Superior Parietal            |    |                         |
|                              |       | 8.93  | -15 | -75  | 39 | Left Cuneus                        |    |                         |
|                              |       | 8.25  | 63  | -42  | 24 | Right Superior Temporal            |    |                         |
|                              |       | 8.22  | 21  | -66  | 33 | Right Superior Occipital           |    |                         |
|                              |       | 8.22  | -30 | -54  | 51 | Left Inferior Parietal             |    |                         |
|                              |       | 8.13  | 48  | -69  | 0  | Right Middle Temporal              |    |                         |
|                              |       | 8.05  | -15 | -60  | 57 | Left Precuneus                     |    |                         |
|                              |       | 7.93  | -30 | -42  | 51 | Left Inferior Parietal             |    |                         |
|                              |       | 7.92  | -27 | -81  | 33 | Left Middle Occipital              |    |                         |
| 1761                         | 0     | 8.6   | 27  | 0    | 63 | Right Superior Frontal             |    |                         |
|                              |       | 7.59  | -24 | -9   | 57 | Left Superior Frontal              |    |                         |
|                              |       | 7.51  | -54 | 3    | 42 | Left Precentral                    |    |                         |
|                              |       | 7.23  | 30  | -3   | 51 | Right Precentral                   |    |                         |
|                              |       | 7.01  | 54  | 9    | 33 | Right Precentral                   |    |                         |
|                              |       | 6.66  | 12  | 15   | 60 | Right Supplementary Motor Area     |    |                         |
|                              |       | 6.59  | -33 | -3   | 45 | Left Precentral                    |    |                         |
|                              |       | 6.55  | 51  | 9    | 24 | Right Inferior Frontal Operculum   |    |                         |
|                              |       | 6.4   | -21 | 0    | 54 | Left Superior Frontal              |    |                         |
|                              |       | 6.31  | 42  | 9    | 30 | Right Inferior Frontal Operculum   |    |                         |
| 66                           | 0.005 | 5.85  | -51 | -48  | 12 | Left Middle Temporal               |    |                         |
|                              |       | 4.25  | -66 | -45  | 9  | Left Middle Temporal               |    |                         |
| 124                          | 0     | 5.7   | -33 | 21   | 6  | Left Insula                        |    |                         |
|                              |       | 4.88  | -27 | 21   | -9 | Left Insula                        |    |                         |
| 43                           | 0.032 | 4.64  | -39 | 15   | -6 | Left Insula                        |    |                         |
|                              |       | 5.05  | -9  | -24  | 12 | Left Thalamus                      |    |                         |
|                              |       | 4.86  | -12 | -12  | 15 | Left Thalamus                      |    |                         |
|                              |       | 4.25  | -18 | -30  | 15 | Left Thalamus                      |    |                         |
| Siblings: Redirect > No-Step |       |       |     |      |    |                                    |    |                         |
| 317                          | 0     | 9.8   | -30 | 18   | 9  | Left Insula                        |    |                         |
|                              |       | 8.65  | -42 | 12   | 3  | Left Insula                        |    |                         |
|                              |       | 6.28  | -45 | 3    | 36 | Left Precentral                    |    |                         |
|                              |       | 5.53  | -39 | 18   | 24 | Left Inferior Frontal Triangularis |    |                         |
|                              |       | 4.69  | -48 | 9    | 15 | Left Inferior Frontal Operculum    |    |                         |
|                              |       | 4.34  | -45 | 3    | 24 | Left Precentral                    |    |                         |
|                              |       | 1129  | 0   | 9.72 | 36 | 18                                 | 3  | Right Insula            |
|                              |       |       |     | 7.7  | 27 | 3                                  | 60 | Right Superior Frontal  |
|                              |       |       |     | 7.35 | 42 | 3                                  | 33 | Right Precentral        |
|                              |       |       |     | 7.05 | 27 | -3                                 | 54 | Right Superior Temporal |
| 6.9                          | 45    |       |     | 9    | 21 | Right Inferior Frontal Operculum   |    |                         |
| 6.49                         | 30    |       |     | 12   | 57 | Right Middle Frontal               |    |                         |
| 6.47                         | -30   |       |     | 0    | 57 | Left Middle Frontal                |    |                         |
| 6.38                         | 6     |       |     | 15   | 51 | Right Supplementary Motor Area     |    |                         |
| 6.32                         | -15   |       |     | 6    | 63 | Left Supplementary Motor Area      |    |                         |
| 6.21                         | -6    |       |     | 3    | 63 | Left Supplementary Motor Area      |    |                         |
| 2587                         | 0     | 8.5   | -45 | -75  | 12 | Left Middle Occipital              |    |                         |
|                              |       | 8.27  | -42 | -69  | 6  | Left Middle Occipital              |    |                         |
|                              |       | 8.04  | 42  | -72  | 15 | Right Middle Occipital             |    |                         |
|                              |       | 8.04  | 60  | -39  | 36 | Right Supramarginal                |    |                         |
|                              |       | 7.22  | 9   | -66  | 51 | Right Precuneus                    |    |                         |
|                              |       | 6.99  | 30  | -69  | 30 | Right Middle Occipital             |    |                         |
|                              |       | 6.89  | 54  | -63  | 12 | Right Middle Temporal              |    |                         |
|                              |       | 6.85  | 36  | -51  | 51 | Right Inferior Parietal            |    |                         |

|                                          |       |  |      |     |     |     |                              |
|------------------------------------------|-------|--|------|-----|-----|-----|------------------------------|
|                                          |       |  | 6.78 | 39  | -45 | 42  | Right Inferior Parietal      |
|                                          |       |  | 6.5  | 60  | -33 | 48  | Right Supramarginal          |
| 234                                      | 0     |  | 6.83 | -36 | -39 | 45  | Left Inferior Parietal       |
|                                          |       |  | 5.34 | -54 | -36 | 36  | Left Supramarginal           |
|                                          |       |  | 4.77 | -63 | -39 | 30  | Left Supramarginal           |
|                                          |       |  | 4.7  | -30 | -48 | 54  | Left Inferior Parietal       |
|                                          |       |  | 4.2  | -39 | -48 | 45  | Left Inferior Parietal       |
| 102                                      | 0     |  | 6.03 | -48 | -45 | 12  | Left Middle Temporal         |
|                                          |       |  | 4.85 | -63 | -57 | 9   | Left Middle Temporal         |
|                                          |       |  | 3.92 | -60 | -63 | 3   | Left Middle Temporal         |
| 58                                       | 0.006 |  | 4.92 | 27  | -60 | -3  | Right Fusiform               |
|                                          |       |  | 4.56 | 33  | -63 | -12 | Right Fusiform               |
|                                          |       |  | 4.15 | 24  | -75 | -9  | Right Fusiform               |
| Siblings > Controls: No-Step > Fixation  |       |  |      |     |     |     |                              |
| 83                                       | 0.005 |  | 5.04 | 6   | -42 | -9  | Vermis                       |
|                                          |       |  | 4.99 | -6  | -51 | -6  | Left Cerebellum              |
|                                          |       |  | 4.31 | 0   | -54 | 0   | Vermis                       |
|                                          |       |  | 3.56 | -15 | -54 | -12 | Left Cerebellum              |
| 111                                      | 0.001 |  | 4.61 | 3   | 18  | 27  | Right Anterior Cingulum      |
|                                          |       |  | 4.55 | -9  | 33  | 30  | Left Anterior Cingulum       |
|                                          |       |  | 3.97 | 0   | 24  | 36  | Left Middle Cingulum         |
| Siblings > Controls: Redirect > Fixation |       |  |      |     |     |     |                              |
| 275                                      | 0     |  | 4.85 | 0   | 27  | 42  | Left Superior Medial Frontal |
|                                          |       |  | 4.72 | -3  | 33  | 33  | Left Superior Medial Frontal |
|                                          |       |  | 4.02 | -3  | 45  | 24  | Left Superior Medial Frontal |
|                                          |       |  | 3.93 | 3   | 42  | 18  | Right Anterior Cingulate     |
|                                          |       |  | 3.9  | 0   | 18  | 42  | Left Superior Medial Frontal |
|                                          |       |  | 3.76 | 0   | 15  | 30  | Left Anterior Cingulate      |
|                                          |       |  | 3.72 | -9  | 39  | 15  | Left Anterior Cingulate      |
|                                          |       |  | 3.63 | 3   | 21  | 24  | Right Anterior Cingulate     |
| 68                                       | 0.01  |  | 4.29 | 36  | 51  | 21  | Right Middle Frontal         |
|                                          |       |  | 4.04 | 30  | 48  | 39  | Right Middle Frontal         |

**Table S2.** Control DCM parameters.

| Connection type             | Connection       | BMA Probability | BMA parameter |
|-----------------------------|------------------|-----------------|---------------|
| Mean Effective Connectivity | From FEF to FEF  | 0.89            | -0.08         |
| Mean Effective Connectivity | From FEF to SEF  | 1.00            | -0.25         |
| Mean Effective Connectivity | From FEF to CD   | 0.00            | 0.00          |
| Mean Effective Connectivity | From FEF to Thal | 1.00            | -0.07         |
| Mean Effective Connectivity | From FEF to SC   | 0.00            | 0.00          |
| Mean Effective Connectivity | From SEF to FEF  | 1.00            | 0.21          |
| Mean Effective Connectivity | From SEF to SEF  | 1.00            | -0.21         |
| Mean Effective Connectivity | From SEF to CD   | 1.00            | 0.08          |
| Mean Effective Connectivity | From SEF to Thal | 0.00            | 0.00          |
| Mean Effective Connectivity | From SEF to SC   | 1.00            | -0.24         |
| Mean Effective Connectivity | From SEF to IFC  | 0.00            | 0.00          |
| Mean Effective Connectivity | From CD to CD    | 1.00            | -0.61         |
| Mean Effective Connectivity | From CD to Thal  | 1.00            | 0.08          |
| Mean Effective Connectivity | From CD to SC    | 1.00            | 0.37          |
| Mean Effective Connectivity | From Thal to FEF | 1.00            | 0.43          |

| Mean Effective Connectivity | From Thal to SEF  | 1.00            | 0.41          |
|-----------------------------|-------------------|-----------------|---------------|
| Mean Effective Connectivity | From Thal to Thal | 1.00            | -0.56         |
| Mean Effective Connectivity | From Thal to IFC  | 1.00            | 0.29          |
| Mean Effective Connectivity | From SC to CD     | 1.00            | 0.11          |
| Mean Effective Connectivity | From SC to Thal   | 1.00            | 0.16          |
| Mean Effective Connectivity | From SC to SC     | 1.00            | -0.50         |
| Mean Effective Connectivity | From IFC to SEF   | 1.00            | 0.11          |
| Mean Effective Connectivity | From IFC to CD    | 1.00            | -0.06         |
| Mean Effective Connectivity | From IFC to Thal  | 0.00            | 0.00          |
| Mean Effective Connectivity | From IFC to IFC   | 1.00            | -0.37         |
| Connection type             | Connection        | BMA Probability | BMA parameter |
| Modulation due to Redirect  | From FEF to FEF   | 1.00            | -1.41         |
| Modulation due to Redirect  | From FEF to SEF   | 0.68            | 0.26          |
| Modulation due to Redirect  | From FEF to CD    | 0.00            | 0.00          |
| Modulation due to Redirect  | From FEF to Thal  | 0.00            | 0.00          |
| Modulation due to Redirect  | From FEF to SC    | 0.00            | 0.00          |
| Modulation due to Redirect  | From SEF to FEF   | 0.00            | 0.00          |
| Modulation due to Redirect  | From SEF to SEF   | 0.86            | -0.66         |
| Modulation due to Redirect  | From SEF to CD    | 0.94            | 0.38          |
| Modulation due to Redirect  | From SEF to Thal  | 0.00            | 0.00          |
| Modulation due to Redirect  | From SEF to SC    | 0.95            | 0.46          |
| Modulation due to Redirect  | From SEF to IFC   | 1.00            | 1.26          |
| Modulation due to Redirect  | From CD to CD     | 1.00            | -1.88         |
| Modulation due to Redirect  | From CD to Thal   | 0.69            | -0.34         |
| Modulation due to Redirect  | From CD to SC     | 0.00            | 0.00          |
| Modulation due to Redirect  | From Thal to FEF  | 0.87            | -0.56         |
| Modulation due to Redirect  | From Thal to SEF  | 1.00            | -1.15         |
| Modulation due to Redirect  | From Thal to Thal | 1.00            | -2.34         |
| Modulation due to Redirect  | From Thal to IFC  | 0.87            | -0.53         |
| Modulation due to Redirect  | From SC to CD     | 0.00            | 0.00          |
| Modulation due to Redirect  | From SC to Thal   | 0.00            | 0.00          |
| Modulation due to Redirect  | From SC to SC     | 1.00            | -1.56         |
| Modulation due to Redirect  | From IFC to SEF   | 1.00            | 1.12          |
| Modulation due to Redirect  | From IFC to CD    | 0.00            | 0.00          |
| Modulation due to Redirect  | From IFC to Thal  | 0.00            | 0.00          |
| Modulation due to Redirect  | From IFC to IFC   | 0.00            | 0.00          |

Note: The PEB and BMA model was not optimized over the C matrix, so C parameters are not estimated in the BMA.

**Table S3.** Sibling DCM parameters.

| Connection type             | Connection       | BMA Probability | BMA parameter |
|-----------------------------|------------------|-----------------|---------------|
| Mean Effective Connectivity | From FEF to FEF  | 0.00            | 0.00          |
| Mean Effective Connectivity | From FEF to SEF  | 1.00            | -0.39         |
| Mean Effective Connectivity | From FEF to CD   | 1.00            | -0.09         |
| Mean Effective Connectivity | From FEF to Thal | 1.00            | -0.06         |
| Mean Effective Connectivity | From FEF to SC   | 1.00            | -0.35         |
| Mean Effective Connectivity | From SEF to FEF  | 1.00            | 0.10          |
| Mean Effective Connectivity | From SEF to SEF  | 1.00            | -0.57         |
| Mean Effective Connectivity | From SEF to CD   | 1.00            | -0.13         |
| Mean Effective Connectivity | From SEF to Thal | 0.00            | 0.00          |
| Mean Effective Connectivity | From SEF to SC   | 1.00            | 0.07          |
| Mean Effective Connectivity | From SEF to IFC  | 0.55            | 0.03          |



| Mean Effective Connectivity | From CD to CD     | 1.00            | -0.57         |
|-----------------------------|-------------------|-----------------|---------------|
| Mean Effective Connectivity | From CD to Thal   | 1.00            | 0.09          |
| Mean Effective Connectivity | From CD to SC     | 1.00            | 0.14          |
| Mean Effective Connectivity | From Thal to FEF  | 1.00            | 0.39          |
| Mean Effective Connectivity | From Thal to SEF  | 1.00            | 0.52          |
| Mean Effective Connectivity | From Thal to Thal | 1.00            | -0.82         |
| Mean Effective Connectivity | From Thal to IFC  | 1.00            | 0.17          |
| Mean Effective Connectivity | From SC to CD     | 1.00            | 0.23          |
| Mean Effective Connectivity | From SC to Thal   | 0.56            | 0.03          |
| Mean Effective Connectivity | From SC to SC     | 1.00            | -0.62         |
| Mean Effective Connectivity | From IFC to SEF   | 1.00            | -0.13         |
| Mean Effective Connectivity | From IFC to CD    | 0.00            | 0.00          |
| Mean Effective Connectivity | From IFC to Thal  | 0.00            | 0.00          |
| Mean Effective Connectivity | From IFC to IFC   | 1.00            | -0.21         |
| Connection type             | Connection        | BMA Probability | BMA parameter |
| Modulation due to Redirect  | From FEF to FEF   | 1.00            | -1.54         |
| Modulation due to Redirect  | From FEF to SEF   | 0.00            | 0.00          |
| Modulation due to Redirect  | From FEF to CD    | 0.00            | 0.00          |
| Modulation due to Redirect  | From FEF to Thal  | 0.00            | 0.00          |
| Modulation due to Redirect  | From FEF to SC    | 0.00            | 0.00          |
| Modulation due to Redirect  | From SEF to FEF   | 0.69            | -0.23         |
| Modulation due to Redirect  | From SEF to SEF   | 1.00            | -2.11         |
| Modulation due to Redirect  | From SEF to CD    | 1.00            | 0.56          |
| Modulation due to Redirect  | From SEF to Thal  | 1.00            | 0.77          |
| Modulation due to Redirect  | From SEF to SC    | 0.76            | 0.28          |
| Modulation due to Redirect  | From SEF to IFC   | 1.00            | 0.88          |
| Modulation due to Redirect  | From CD to CD     | 1.00            | -2.97         |
| Modulation due to Redirect  | From CD to Thal   | 0.85            | 0.55          |
| Modulation due to Redirect  | From CD to SC     | 0.00            | 0.00          |
| Modulation due to Redirect  | From Thal to FEF  | 1.00            | -0.67         |
| Modulation due to Redirect  | From Thal to SEF  | 0.00            | 0.00          |
| Modulation due to Redirect  | From Thal to Thal | 1.00            | -1.72         |
| Modulation due to Redirect  | From Thal to IFC  | 0.00            | 0.00          |
| Modulation due to Redirect  | From SC to CD     | 1.00            | -0.96         |
| Modulation due to Redirect  | From SC to Thal   | 1.00            | -0.49         |
| Modulation due to Redirect  | From SC to SC     | 0.83            | -0.66         |
| Modulation due to Redirect  | From IFC to SEF   | 0.00            | 0.00          |
| Modulation due to Redirect  | From IFC to CD    | 0.00            | 0.00          |
| Modulation due to Redirect  | From IFC to Thal  | 0.87            | -0.45         |
| Modulation due to Redirect  | From IFC to IFC   | 0.60            | -0.29         |

Note: The PEB and BMA model was not optimized over the C matrix, so C parameters are not estimated in the BMA.

**Table S4.** Group DCM analysis.

| Connection Type             | Connection        | BMA Probability | BMA parameter |
|-----------------------------|-------------------|-----------------|---------------|
| Mean Effective Connectivity | From FEF to FEF   | 0.00            | 0.00          |
| Mean Effective Connectivity | From FEF to SEF   | 1.00            | -0.30         |
| Mean Effective Connectivity | From FEF to CD    | 1.00            | -0.06         |
| Mean Effective Connectivity | From FEF to Thal  | 1.00            | -0.08         |
| Mean Effective Connectivity | From FEF to SC    | 1.00            | -0.21         |
| Mean Effective Connectivity | From SEF to FEF   | 1.00            | 0.10          |
| Mean Effective Connectivity | From SEF to SEF   | 1.00            | -0.25         |
| Mean Effective Connectivity | From SEF to CD    | 0.00            | 0.00          |
| Mean Effective Connectivity | From SEF to Thal  | 0.00            | 0.00          |
| Mean Effective Connectivity | From SEF to SC    | 1.00            | -0.08         |
| Mean Effective Connectivity | From SEF to IFC   | 0.00            | 0.00          |
| Mean Effective Connectivity | From CD to CD     | 1.00            | -0.62         |
| Mean Effective Connectivity | From CD to Thal   | 1.00            | 0.07          |
| Mean Effective Connectivity | From CD to SC     | 1.00            | 0.25          |
| Mean Effective Connectivity | From Thal to FEF  | 1.00            | 0.40          |
| Mean Effective Connectivity | From Thal to SEF  | 1.00            | 0.46          |
| Mean Effective Connectivity | From Thal to Thal | 1.00            | -0.63         |
| Mean Effective Connectivity | From Thal to IFC  | 1.00            | 0.23          |
| Mean Effective Connectivity | From SC to CD     | 1.00            | 0.13          |
| Mean Effective Connectivity | From SC to Thal   | 1.00            | 0.11          |
| Mean Effective Connectivity | From SC to SC     | 1.00            | -0.55         |
| Mean Effective Connectivity | From IFC to SEF   | 0.00            | 0.00          |
| Mean Effective Connectivity | From IFC to CD    | 0.00            | 0.00          |
| Mean Effective Connectivity | From IFC to Thal  | 0.00            | 0.00          |
| Mean Effective Connectivity | From IFC to IFC   | 1.00            | -0.24         |
| Connection Type             | Connection        | BMA Probability | BMA parameter |
| Mean Modulation             | From FEF to FEF   | 1.00            | -1.41         |
| Mean Modulation             | From FEF to SEF   | 0.00            | 0.00          |
| Mean Modulation             | From FEF to CD    | 0.00            | 0.00          |
| Mean Modulation             | From FEF to Thal  | 0.54            | -0.12         |
| Mean Modulation             | From FEF to SC    | 0.00            | 0.00          |
| Mean Modulation             | From SEF to FEF   | 0.00            | 0.00          |
| Mean Modulation             | From SEF to SEF   | 1.00            | -1.61         |
| Mean Modulation             | From SEF to CD    | 1.00            | 0.48          |
| Mean Modulation             | From SEF to Thal  | 1.00            | 0.32          |
| Mean Modulation             | From SEF to SC    | 1.00            | 0.47          |
| Mean Modulation             | From SEF to IFC   | 1.00            | 1.13          |
| Mean Modulation             | From CD to CD     | 1.00            | -2.17         |
| Mean Modulation             | From CD to Thal   | 0.00            | 0.00          |
| Mean Modulation             | From CD to SC     | 0.00            | 0.00          |
| Mean Modulation             | From Thal to FEF  | 1.00            | -0.56         |
| Mean Modulation             | From Thal to SEF  | 1.00            | -0.73         |
| Mean Modulation             | From Thal to Thal | 1.00            | -1.70         |
| Mean Modulation             | From Thal to IFC  | 1.00            | -0.54         |
| Mean Modulation             | From SC to CD     | 1.00            | -0.48         |
| Mean Modulation             | From SC to Thal   | 0.00            | 0.00          |
| Mean Modulation             | From SC to SC     | 1.00            | -0.88         |
| Mean Modulation             | From IFC to SEF   | 1.00            | 0.57          |
| Mean Modulation             | From IFC to CD    | 0.00            | 0.00          |
| Mean Modulation             | From IFC to Thal  | 0.00            | 0.00          |

|                                        |                   |                 |               |
|----------------------------------------|-------------------|-----------------|---------------|
| Mean Modulation                        | From IFC to IFC   | 0.00            | 0.00          |
| Connection Type                        | Connection        | BMA Probability | BMA parameter |
| Group Differences in Mean Connectivity | From FEF to FEF   | 1.00            | 0.07          |
| Group Differences in Mean Connectivity | From FEF to SEF   | 1.00            | -0.06         |
| Group Differences in Mean Connectivity | From FEF to CD    | 1.00            | -0.04         |
| Group Differences in Mean Connectivity | From FEF to Thal  | 0.00            | 0.00          |
| Group Differences in Mean Connectivity | From FEF to SC    | 1.00            | -0.16         |
| Group Differences in Mean Connectivity | From SEF to FEF   | 0.00            | 0.00          |
| Group Differences in Mean Connectivity | From SEF to SEF   | 1.00            | -0.15         |
| Group Differences in Mean Connectivity | From SEF to CD    | 1.00            | -0.07         |
| Group Differences in Mean Connectivity | From SEF to Thal  | 0.53            | 0.02          |
| Group Differences in Mean Connectivity | From SEF to SC    | 1.00            | 0.15          |
| Group Differences in Mean Connectivity | From SEF to IFC   | 0.00            | 0.00          |
| Group Differences in Mean Connectivity | From CD to CD     | 0.00            | 0.00          |
| Group Differences in Mean Connectivity | From CD to Thal   | 0.00            | 0.00          |
| Group Differences in Mean Connectivity | From CD to SC     | 1.00            | -0.10         |
| Group Differences in Mean Connectivity | From Thal to FEF  | 0.00            | 0.00          |
| Group Differences in Mean Connectivity | From Thal to SEF  | 0.00            | 0.00          |
| Group Differences in Mean Connectivity | From Thal to Thal | 1.00            | -0.08         |
| Group Differences in Mean Connectivity | From Thal to IFC  | 0.57            | -0.04         |
| Group Differences in Mean Connectivity | From SC to CD     | 0.00            | 0.00          |
| Group Differences in Mean Connectivity | From SC to Thal   | 0.64            | -0.03         |
| Group Differences in Mean Connectivity | From SC to SC     | 1.00            | -0.08         |
| Group Differences in Mean Connectivity | From IFC to SEF   | 1.00            | -0.11         |
| Group Differences in Mean Connectivity | From IFC to CD    | 0.00            | 0.00          |
| Group Differences in Mean Connectivity | From IFC to Thal  | 0.51            | -0.02         |
| Group Differences in Mean Connectivity | From IFC to IFC   | 1.00            | 0.13          |
| Connection Type                        | Connection        | BMA Probability | BMA parameter |
| Group Differences in Modulation        | From FEF to FEF   | 0.00            | 0.00          |
| Group Differences in Modulation        | From FEF to SEF   | 0.00            | 0.00          |
| Group Differences in Modulation        | From FEF to CD    | 0.00            | 0.00          |
| Group Differences in Modulation        | From FEF to Thal  | 0.00            | 0.00          |
| Group Differences in Modulation        | From FEF to SC    | 0.00            | 0.00          |
| Group Differences in Modulation        | From SEF to FEF   | 1.00            | -0.31         |
| Group Differences in Modulation        | From SEF to SEF   | 0.62            | -0.29         |
| Group Differences in Modulation        | From SEF to CD    | 0.00            | 0.00          |
| Group Differences in Modulation        | From SEF to Thal  | 0.64            | 0.16          |
| Group Differences in Modulation        | From SEF to SC    | 0.00            | 0.00          |
| Group Differences in Modulation        | From SEF to IFC   | 0.00            | 0.00          |
| Group Differences in Modulation        | From CD to CD     | 0.00            | 0.00          |
| Group Differences in Modulation        | From CD to Thal   | 0.69            | 0.31          |
| Group Differences in Modulation        | From CD to SC     | 0.00            | 0.00          |
| Group Differences in Modulation        | From Thal to FEF  | 0.00            | 0.00          |
| Group Differences in Modulation        | From Thal to SEF  | 1.00            | 0.69          |
| Group Differences in Modulation        | From Thal to Thal | 0.00            | 0.00          |
| Group Differences in Modulation        | From Thal to IFC  | 0.00            | 0.00          |
| Group Differences in Modulation        | From SC to CD     | 1.00            | -0.30         |
| Group Differences in Modulation        | From SC to Thal   | 1.00            | -0.35         |
| Group Differences in Modulation        | From SC to SC     | 1.00            | 0.58          |
| Group Differences in Modulation        | From IFC to SEF   | 1.00            | -0.58         |
| Group Differences in Modulation        | From IFC to CD    | 0.00            | 0.00          |
| Group Differences in Modulation        | From IFC to Thal  | 0.00            | 0.00          |

|                                 |                 |      |      |
|---------------------------------|-----------------|------|------|
| Group Differences in Modulation | From IFC to IFC | 0.00 | 0.00 |
|---------------------------------|-----------------|------|------|

**Table S5.** Regressions examining the relationship between DCM parameters and TSRT within both groups.

| Parameter                   | Intercept |        | Group Main Effect |       | Parameter Main Effect |       | Group*Param Interaction |       | Model Fit |       |                     |
|-----------------------------|-----------|--------|-------------------|-------|-----------------------|-------|-------------------------|-------|-----------|-------|---------------------|
|                             | Est.      | P      | Est.              | P     | Est.                  | P     | Est.                    | P     | F(3,39)   | P     | Adj. R <sup>2</sup> |
| FEF to FEF                  | 138.39    | <0.001 | -10.31            | 0.589 | 299.96                | 0.285 | 354.85                  | 0.208 | 1.69      | 0.186 | 0.05                |
| FEF to SEF                  | 168.26    | <0.001 | 0.40              | 0.960 | 26.26                 | 0.217 | -28.67                  | 0.182 | 1.96      | 0.136 | 0.06                |
| FEF to CD                   | 179.50    | <0.001 | 26.51             | 0.002 | 154.93                | 0.518 | 265.25                  | 0.270 | 3.73      | 0.019 | 0.16                |
| SEF to CD                   | 171.91    | <0.001 | 27.02             | 0.180 | 169.84                | 0.348 | 58.33                   | 0.746 | 1.44      | 0.246 | 0.03                |
| SEF to SC                   | 163.26    | <0.001 | -0.61             | 0.971 | 67.65                 | 0.688 | 25.19                   | 0.881 | 1.21      | 0.318 | 0.01                |
| CD to SC                    | 150.66    | <0.001 | 17.47             | 0.222 | 32.11                 | 0.458 | -22.05                  | 0.610 | 1.33      | 0.278 | 0.02                |
| Thal to Thal                | 174.71    | 0.511  | -185.61           | 0.485 | 76.38                 | 0.824 | -295.75                 | 0.393 | 1.60      | 0.206 | 0.04                |
| rIFC to SEF                 | 127.78    | <0.001 | -32.57            | 0.093 | -290.45               | 0.032 | -232.49                 | 0.082 | 3.12      | 0.037 | 0.13                |
| rIFC to rIFC                | 162.57    | 0.003  | -86.86            | 0.099 | -116.94               | 0.588 | -381.88                 | 0.083 | 2.33      | 0.089 | 0.09                |
| Modulation: Thalamus to SEF | 160.39    | <0.001 | 8.55              | 0.096 | 0.95                  | 0.827 | 2.28                    | 0.601 | 1.20      | 0.322 | 0.01                |

## References

- Birchwood, M., Smith, J., Cochrane, R., Wetton, S., & Copestake, S. (1990). The social functioning scale the development and validation of a new scale of social adjustment for use in family intervention programmes with schizophrenic patients. *The British Journal of Psychiatry*, 157(6), 853-859.
- Jeffreys, H. (1961). *Theory of probability* (3rd ed.). Oxford University Press. MR0187257, 432.
- Raftery, A. E. (1995). Bayesian model selection in social research. *Sociological methodology*, 111-163.
- Rouder, J. N., Speckman, P. L., Sun, D., Morey, R. D., & Iverson, G. (2009). Bayesian t tests for accepting and rejecting the null hypothesis. *Psychonomic bulletin & review*, 16(2), 225-237.
- Wetzels, R., Matzke, D., Lee, M. D., Rouder, J. N., Iverson, G. J., & Wagenmakers, E.-J. (2011). Statistical evidence in experimental psychology: An empirical comparison using 855 t tests. *Perspectives on Psychological Science*, 6(3), 291-298.
